# Supplementary material for: Performance evaluation of five lipoprotein(a) immunoassays on the Roche cobas c501 chemistry analyzer
Source: PubMed Central journal article supplement — Pract Lab Med. 2021 Mar 24;25:e00218. doi: 10.1016/j.plabm.2021.e00218 (PMC8056269; doi:10.1016/j.plabm.2021.e00218), 2021-03-24
Supplement: mmc1.pdf [file mmc1.pdf]

Y, Kamiya  
X, Diazyme

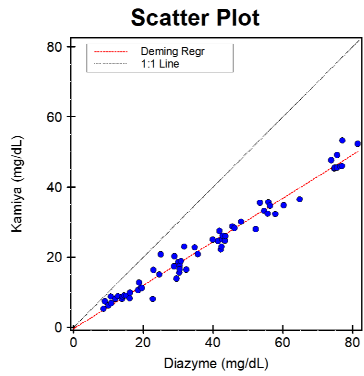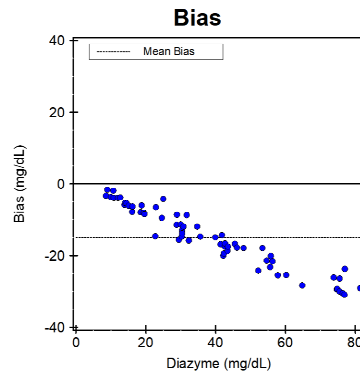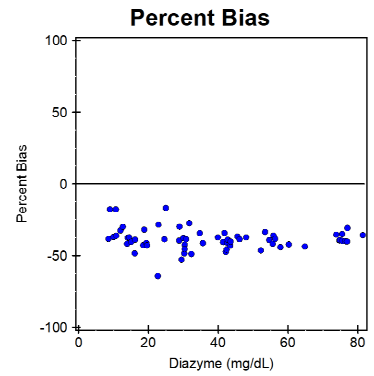

Y, MedTest  
X, Diazyme

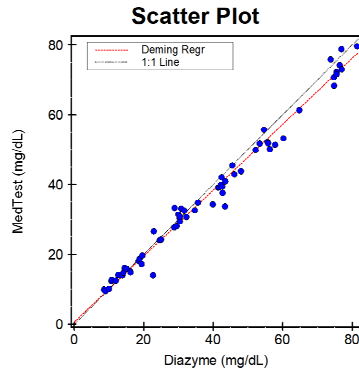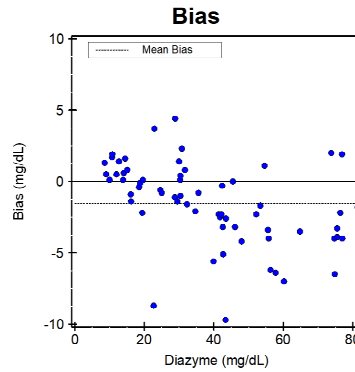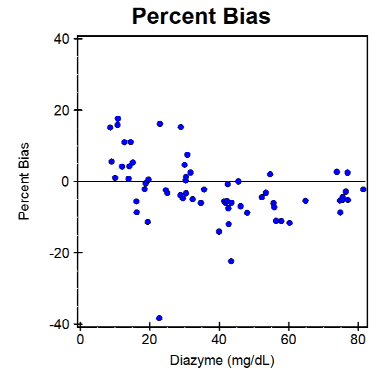

Y, Randox  
X, Diazyme

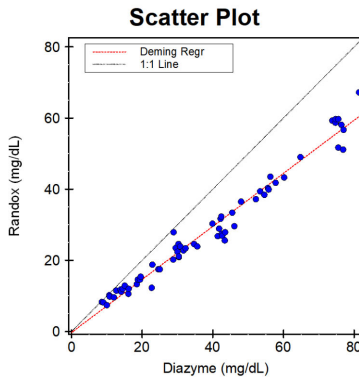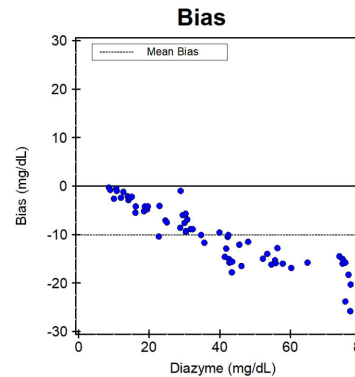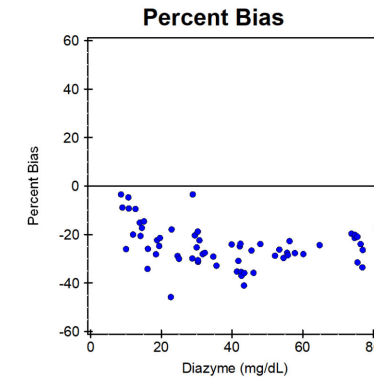

Y, Roche  
X, Diazyme

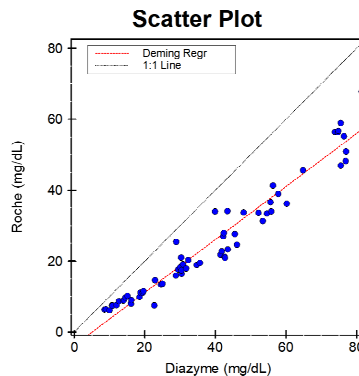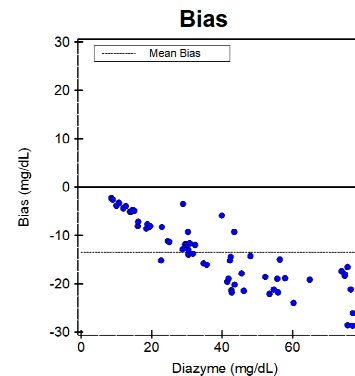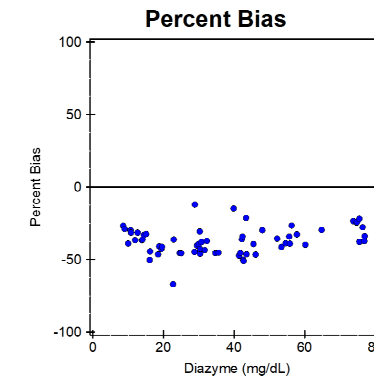

Summary Results

| X Method | Y Method | Slope | Intercept (mg/dL) | R      | Bias (mg/dL) | % Bias |
|----------|----------|-------|-------------------|--------|--------------|--------|
| Diazyme  | Kamiya   | 0.620 | -0.41             | 0.9864 | -15.02       | -39.0  |
| Diazyme  | MedTest  | 0.945 | 0.62              | 0.9920 | -1.52        | -3.9   |
| Diazyme  | Randox   | 0.746 | -0.28             | 0.9858 | -10.06       | -26.1  |
| Diazyme  | Roche    | 0.747 | -3.81             | 0.9706 | -13.53       | -35.2  |

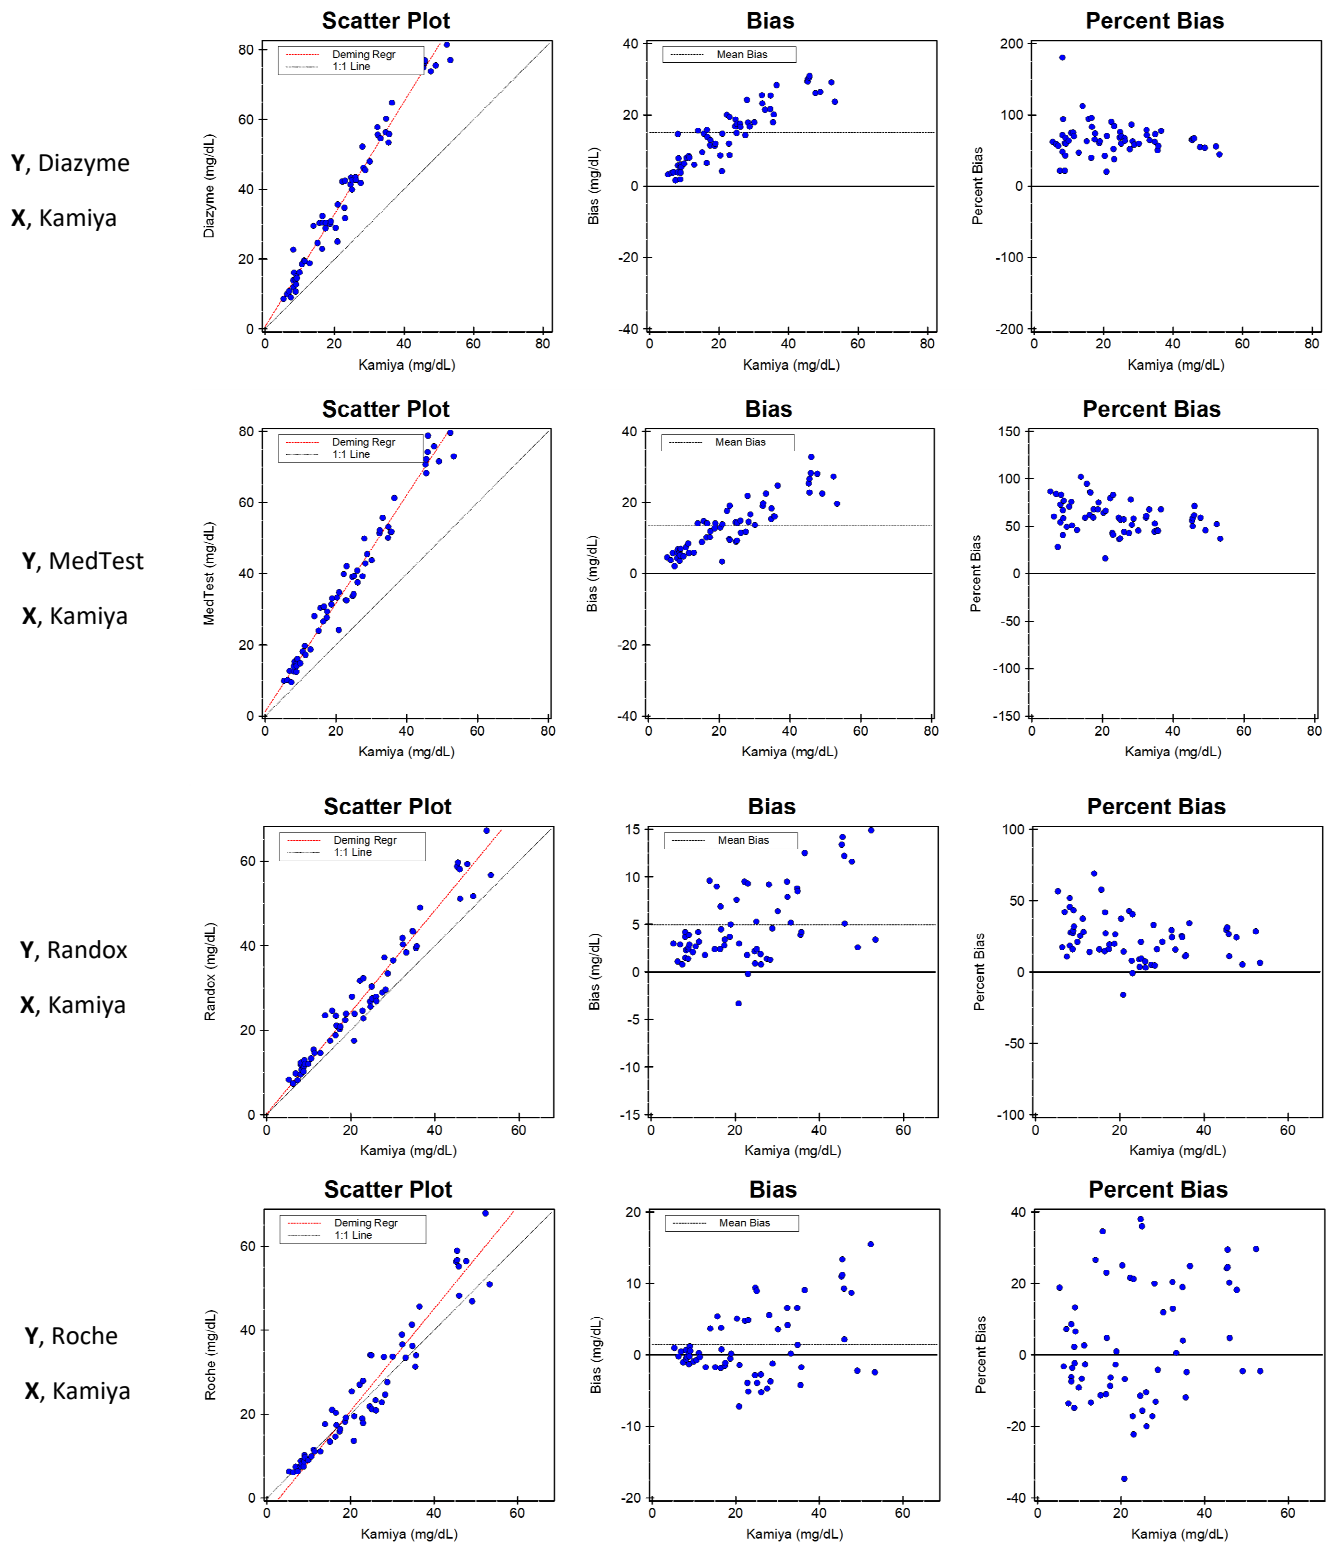

Summary Results

| X Method | Y Method | Slope | Intercept (mg/dL) | R      | Bias (mg/dL) | % Bias |
|----------|----------|-------|-------------------|--------|--------------|--------|
| Kamiya   | Diazyme  | 1.612 | 0.65              | 0.9864 | 15.02        | 64.0   |
| Kamiya   | MedTest  | 1.523 | 1.24              | 0.9861 | 13.50        | 57.5   |
| Kamiya   | Randox   | 1.205 | 0.15              | 0.9787 | 4.96         | 21.1   |
| Kamiya   | Roche    | 1.216 | -3.59             | 0.9624 | 1.49         | 6.3    |

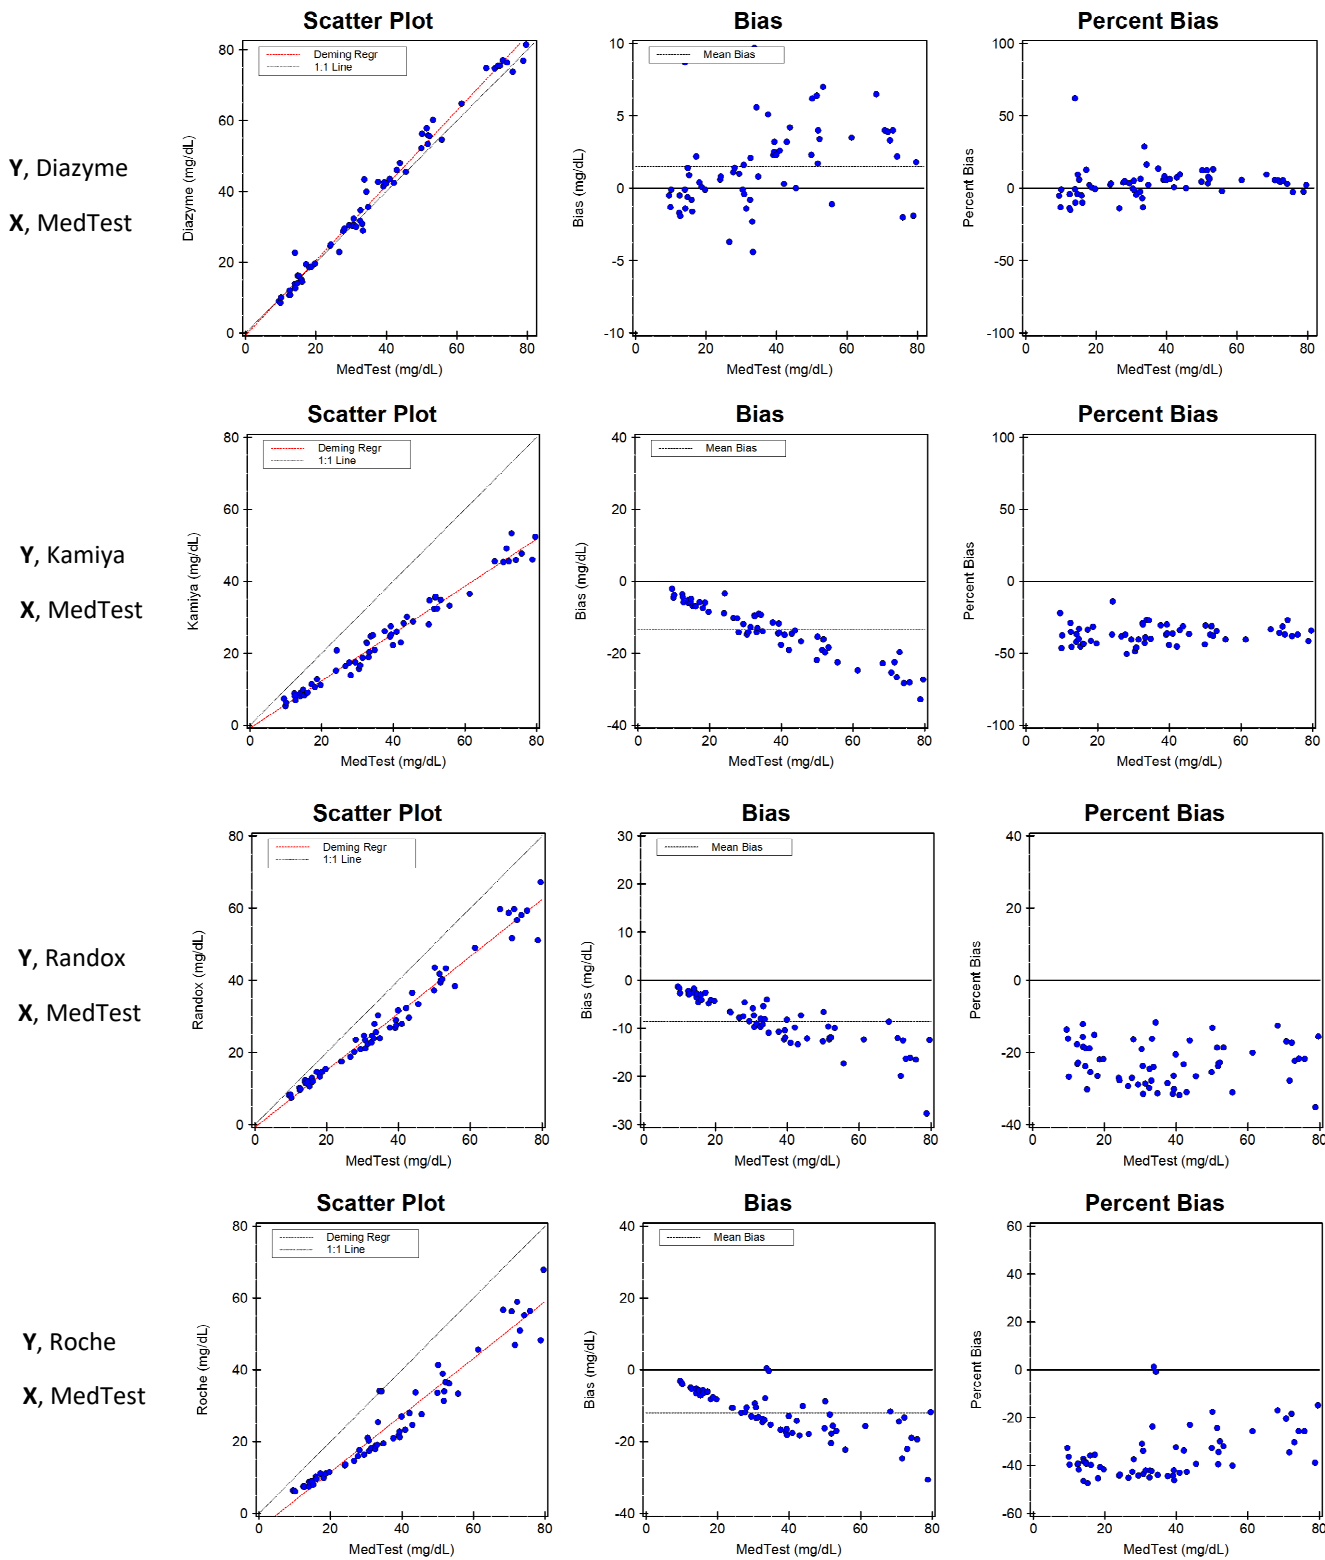

| Summary Results | X Method | Y Method | Slope | Intercept (mg/dL) | R      | Bias (mg/dL) | % Bias |
|-----------------|----------|----------|-------|-------------------|--------|--------------|--------|
|                 | MedTest  | Diazyme  | 1.059 | -0.65             | 0.9920 | 1.52         | 4.1    |
| MedTest         | Kamiya   | 0.657    | -0.81 | 0.9681            | -13.50 | -36.5        |        |
| MedTest         | Randox   | 0.790    | -0.78 | 0.9868            | -8.54  | -23.1        |        |
| MedTest         | Roche    | 0.792    | -4.31 | 0.9678            | -12.02 | -32.5        |        |

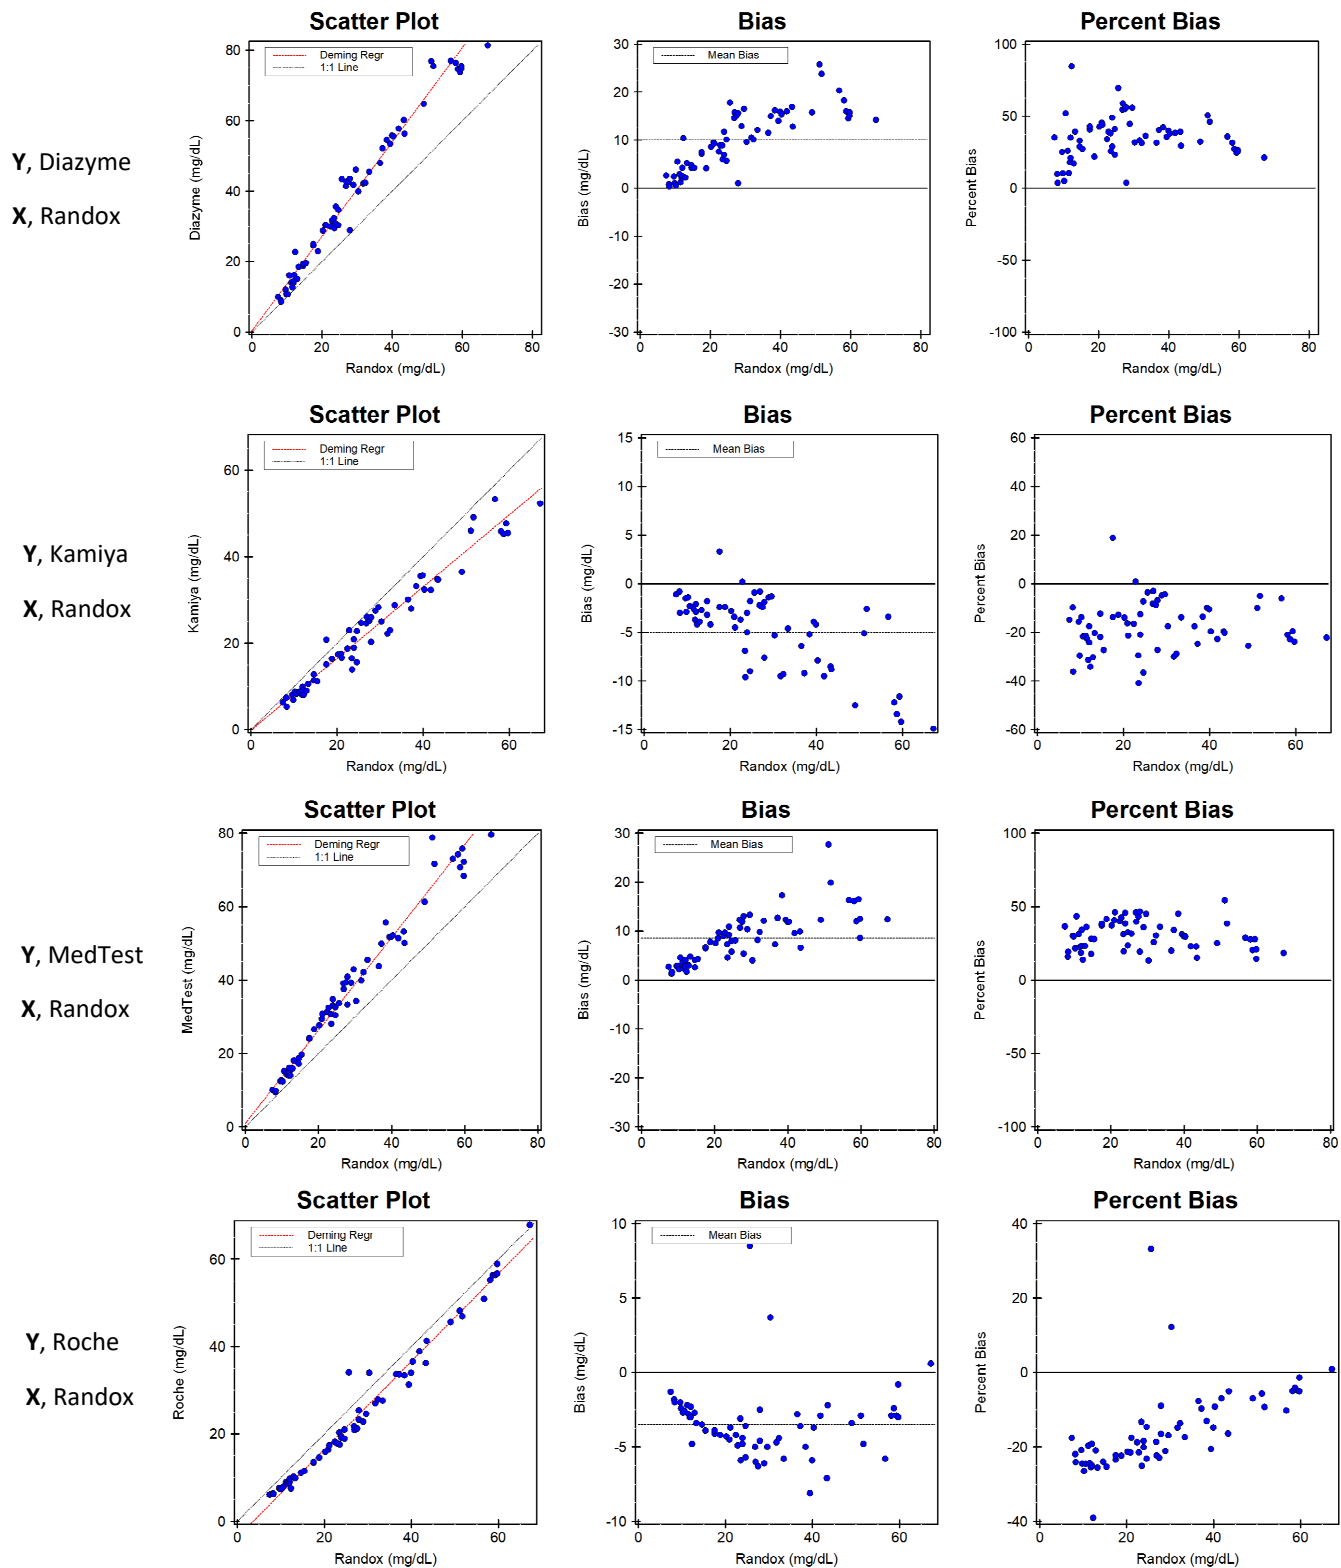

Summary Results

| X Method | Y Method | Slope | Intercept (mg/dL) | R      | Bias (mg/dL) | % Bias |
|----------|----------|-------|-------------------|--------|--------------|--------|
| Randox   | Diazyme  | 1.341 | 0.37              | 0.9858 | 10.06        | 35.4   |
| Randox   | Kamiya   | 0.830 | -0.13             | 0.9787 | -4.96        | -17.5  |
| Randox   | MedTest  | 1.266 | 0.99              | 0.9868 | 8.54         | 30.0   |
| Randox   | Roche    | 1.006 | -3.66             | 0.9890 | -3.48        | -12.2  |



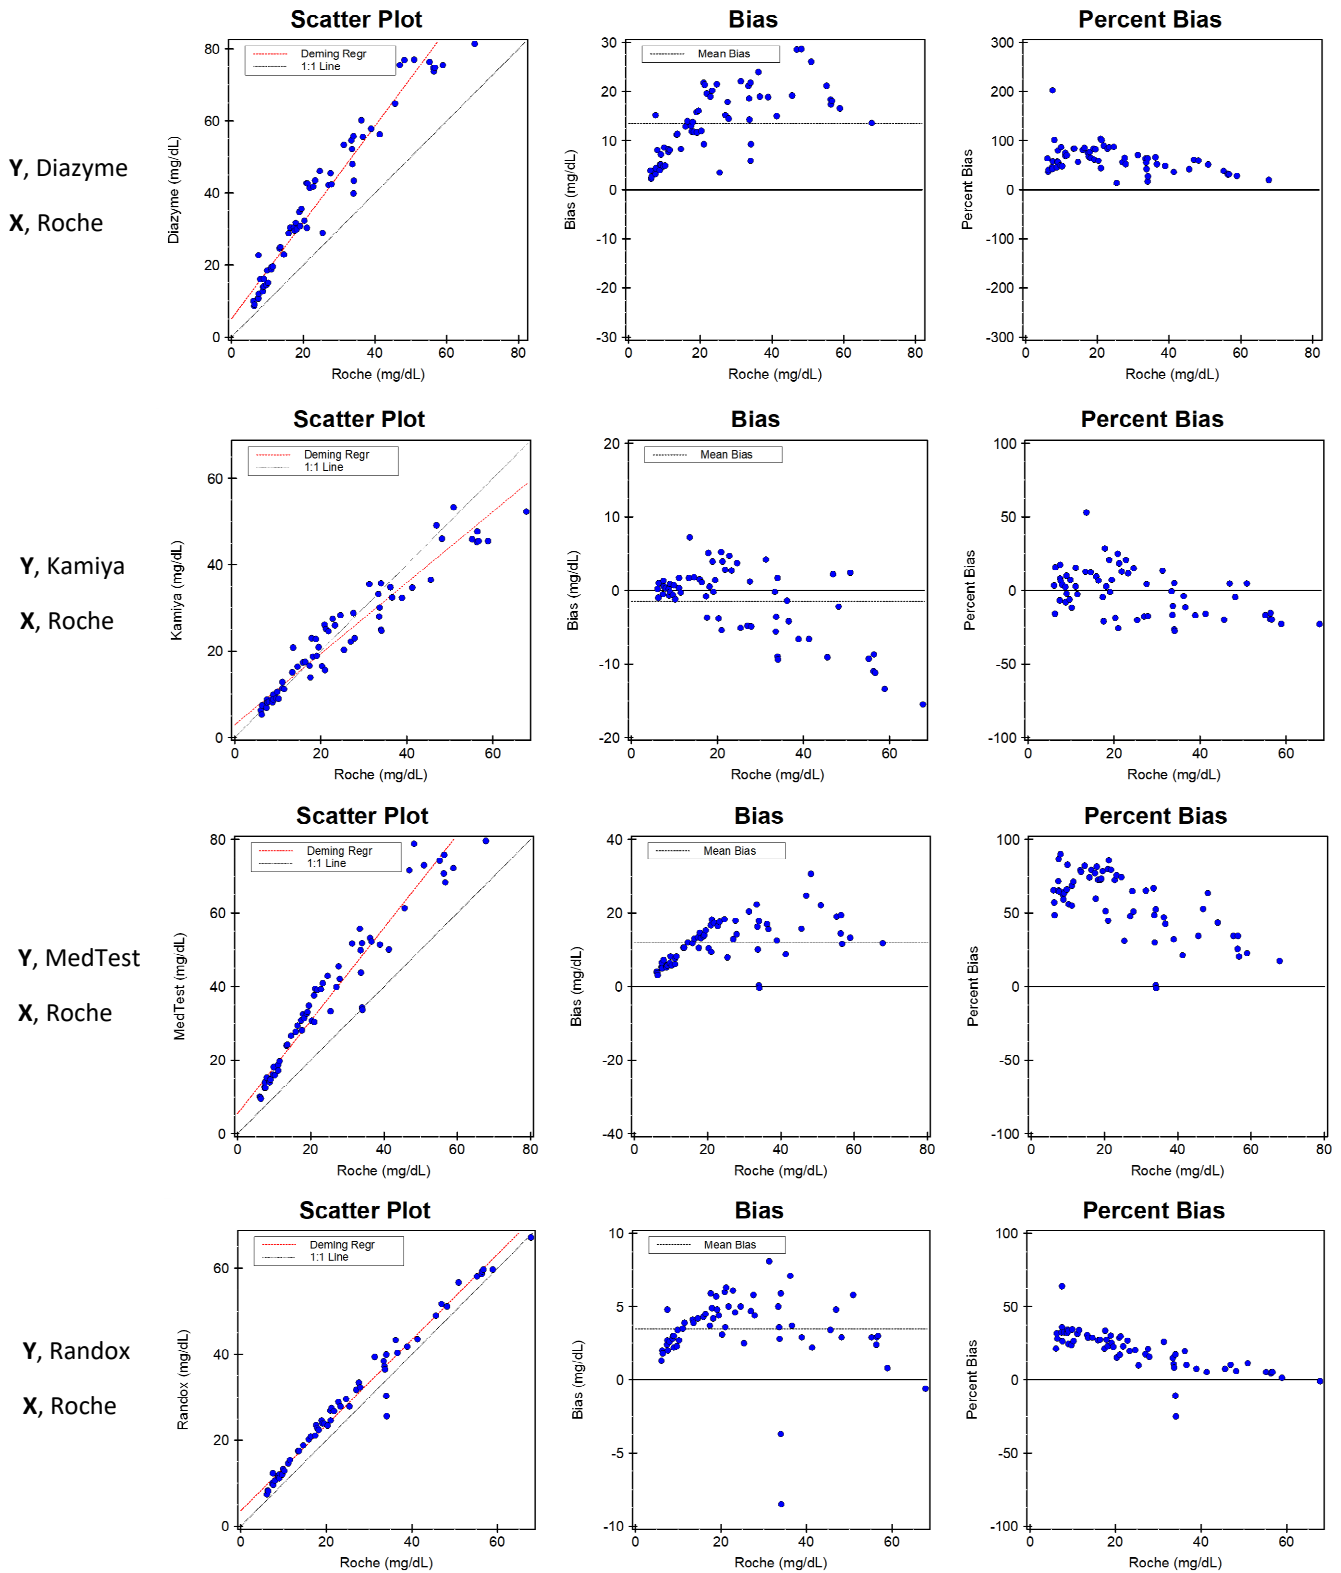

| Summary Results | X Method | Y Method | Slope | Intercept (mg/dL) | R      | Bias (mg/dL) | % Bias |
|-----------------|----------|----------|-------|-------------------|--------|--------------|--------|
|                 | Roche    | Diazyme  | 1.338 | 5.10              | 0.9706 | 13.53        | 54.2   |
| Roche           | Kamiya   | 0.822    | 2.95  | 0.9624            | -1.49  | -6.0         |        |
| Roche           | MedTest  | 1.263    | 5.45  | 0.9678            | 12.02  | 48.2         |        |
| Roche           | Randox   | 0.994    | 3.63  | 0.9890            | 3.48   | 13.9         |        |
